# Supplementary material for: Thinning and surface mass balance patterns of two neighbouring debris-covered glaciers in the southeastern Tibetan Plateau
Source: Copernicus journal article supplement (doi:10.5194/tc-17-3895-2023), 2023-09-12
Supplement: Supplementary file 1 [file tc-17-3895-2023-supplement.pdf]

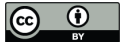

*Supplement of*

## **Thinning and surface mass balance patterns of two neighbouring debris-covered glaciers in the southeastern Tibetan Plateau**

**Chuanxi Zhao et al.**

*Correspondence to:* Wei Yang ([yangww@itpcas.ac.cn](mailto:yangww@itpcas.ac.cn))

The copyright of individual parts of the supplement might differ from the article licence.

## Supporting information

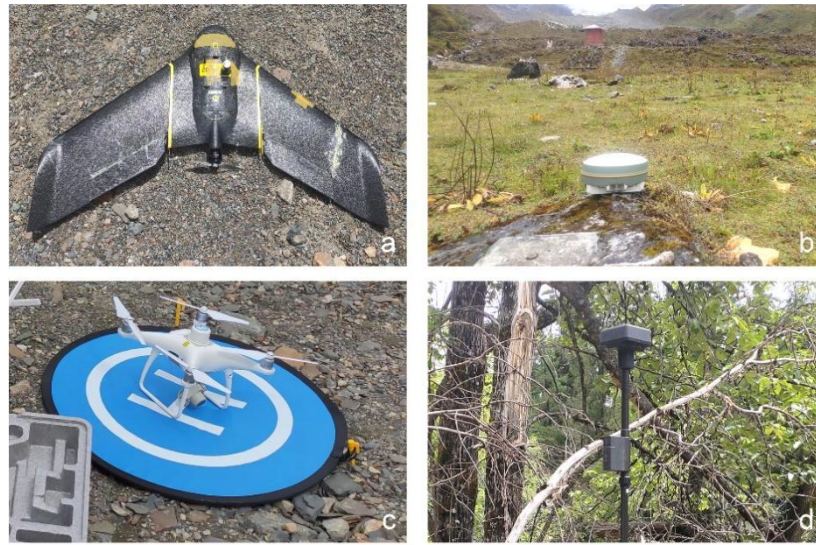

Figure S1. eBee Plus UAV (a), Huaxing A10 GNSS GPS for PPK base station (b), DJI Phantom 4 RTK UAV (c), DJI D-RTK 2 for RTK base station (d).

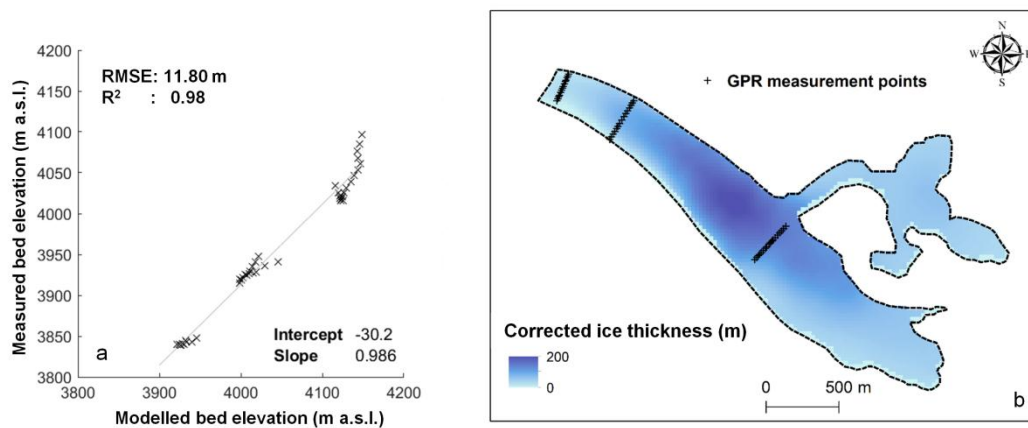

Figure S2. The fitting correction to the Farinotti et al. (2019) dataset based on 24K Glacier GPR data (a) spatial distribution of corrected ice thickness and GPR measurement points (b).

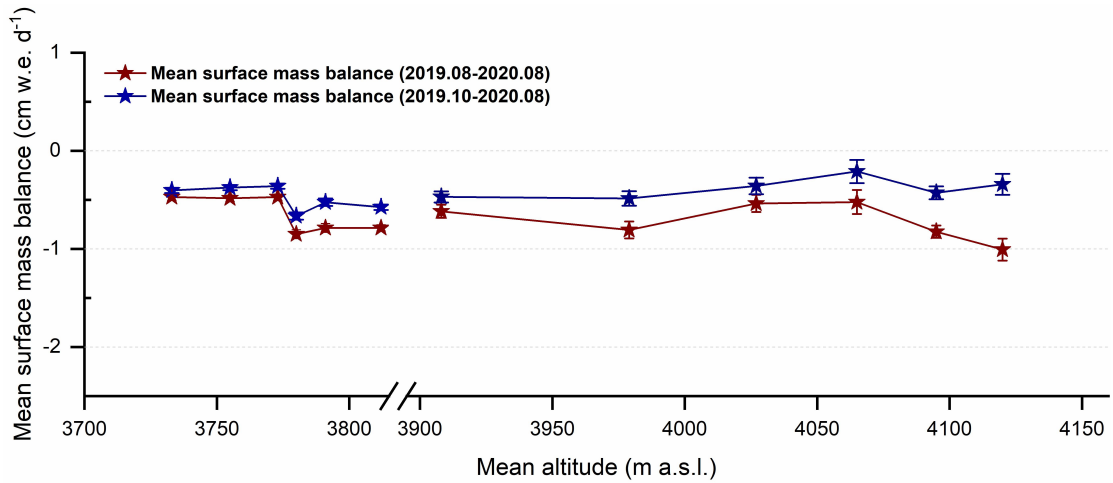

Figure S3. The daily surface mass balance and its uncertainty for the individual zones of two glaciers during the cold period (October 2019-August 2020; blue solid line) and at the annual timescale (August 2019-August 2020; red solid line).

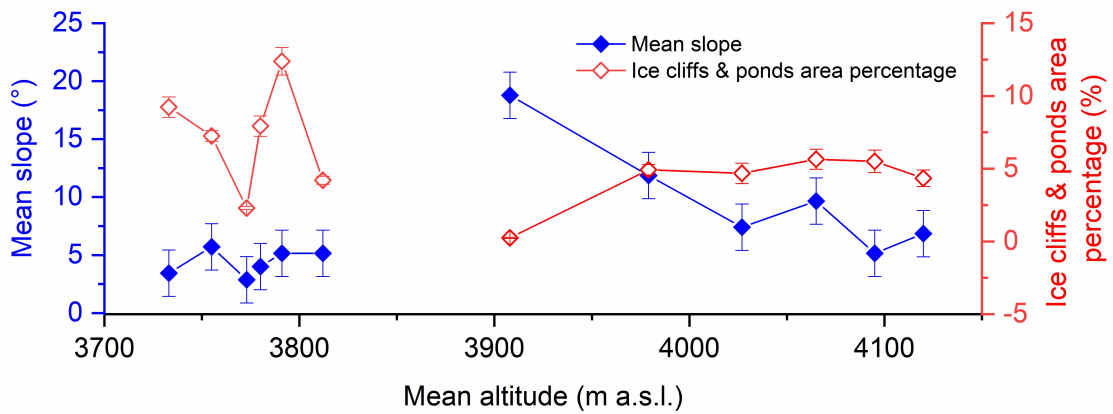

Figure S4. The mean slope (blue solid line) and the mean percentage of the ice cliffs and supraglacial ponds area (red solid line) for the individual zones of the two glaciers.

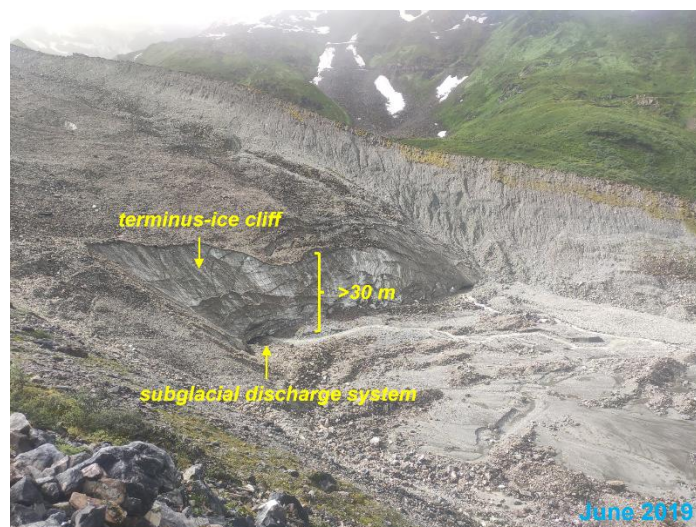

Figure S5. *In situ* photograph for 24K Glacier terminus.

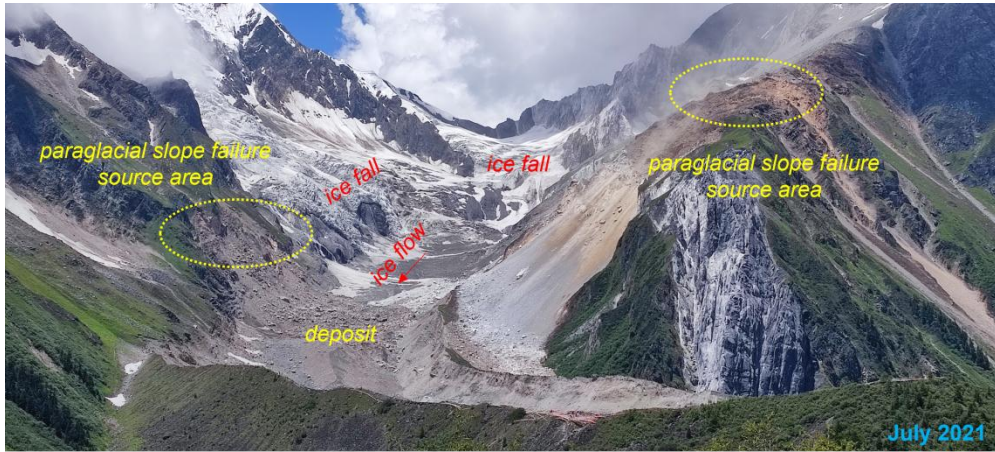

Figure S6. *In situ* photograph for 23K Glacier upper area and a captured paraglacial slope failure event.
